# Supplementary material for: DBMLFF: linear scaling machine learning force fields via electron density decomposition for molecular electrolytes
Source: Royal Society of Chemistry journal article supplement (doi:10.1039/d5dd00508f), 2026-01-01
Supplement: d5dd00508f1.pdf [file d5dd00508f1.pdf]

**Supporting Information for**

**DBMLFF: Linear scaling machine learning force fields via electron density  
decomposition for molecular electrolytes**

Jie Shen<sup>a</sup>, Chenyu Wang<sup>a</sup>, Libin Chen<sup>a</sup>, Shaoqin Jiang<sup>c,\*</sup>, Jianhui Chen<sup>a</sup>, Cuilian Wen<sup>a</sup>, Bo Wu<sup>a</sup>,  
Baisheng Sa<sup>a,\*</sup>, Lin-Wang Wang<sup>b,\*</sup>

<sup>a</sup> *State Key Laboratory of Green and Efficient Development of Phosphorus Resources, Materials  
Genome Institute, College of Materials Science and Engineering, Fuzhou University, Fuzhou 350108,  
China.*

<sup>b</sup> *Institute of Semiconductor, Chinese Academy of Science, Beijing, 100083, China*

<sup>c</sup> *LonXun KuangTeng Technology Inc, Beijing, 100083, China*

**E-mail addresses:**

\*bssa@fzu.edu.cn (B. Sa);

\*jiangshaoqin@pwmatt.com (S. Jiang);

\*lwwang@semi.ac.cn (L.-W. Wang)

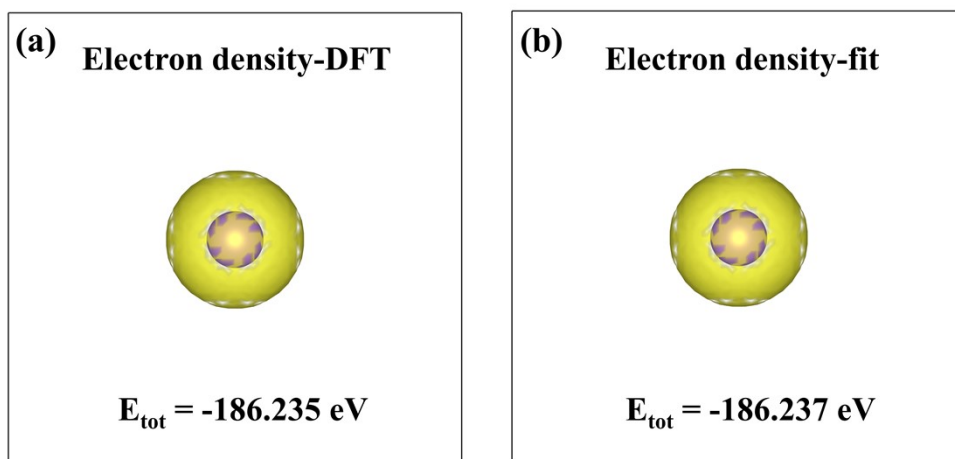

**Fig. S1** Isosurface plots and corresponding total energy values of (a) DFT-calculated and (b) spherically-fitted charge density distributions for  $\text{Li}^+$  ion with the isosurface value of  $0.00001 \text{ e/bohr}^3$ .

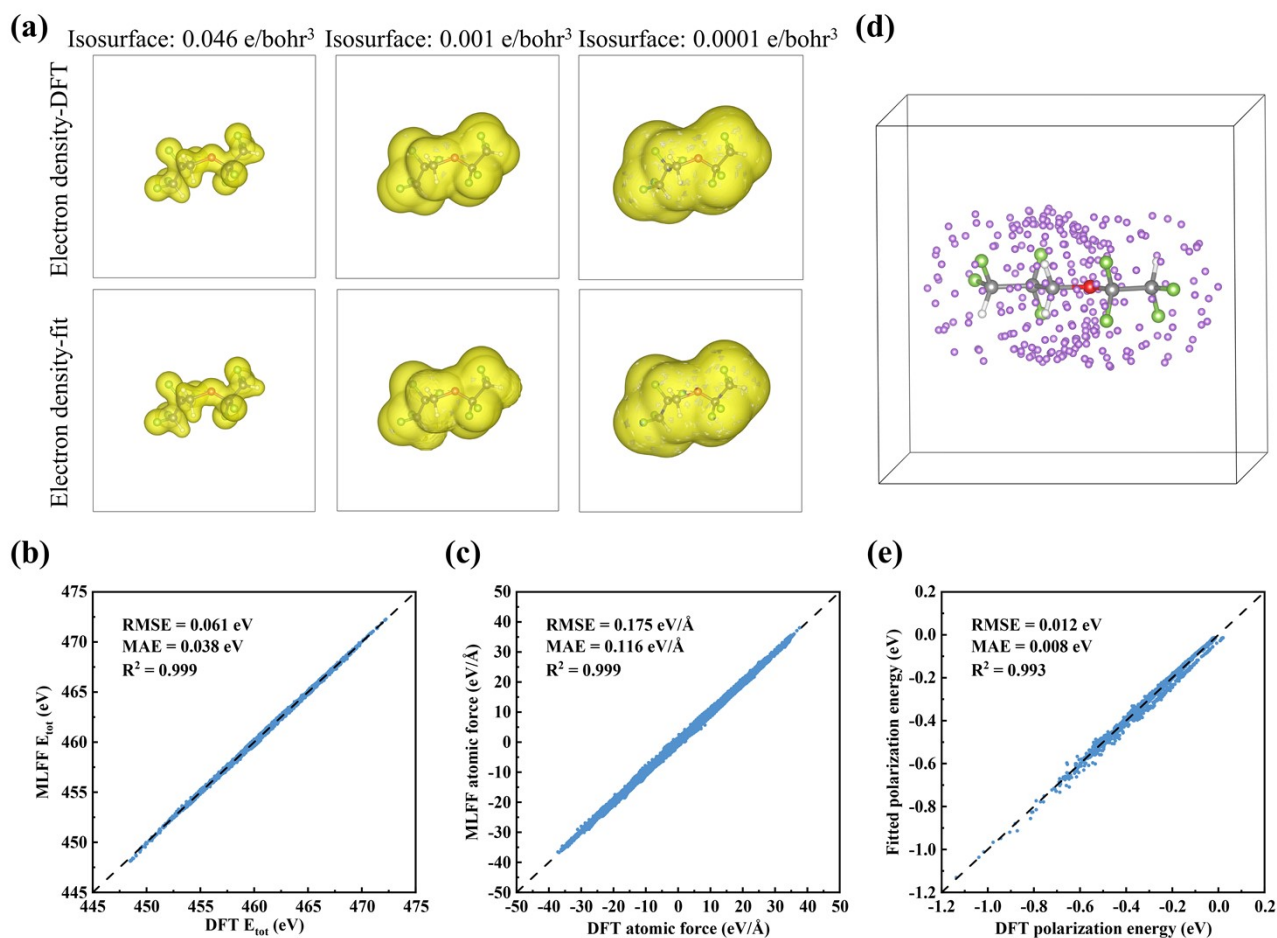

**Fig. S2** TTE molecule analysis: (a) DFT-calculated (upper) vs. spherically-fitted (lower) electron density isosurfaces at multiple values; (b) MLFF-predicted total energy and (c) atomic forces across configurations; (d) Probe charge position  $R_p$  distribution at a representative probe-molecule distance; (e) Correlation between DFT-calculated and fitted polarization energies under varied probe configurations.

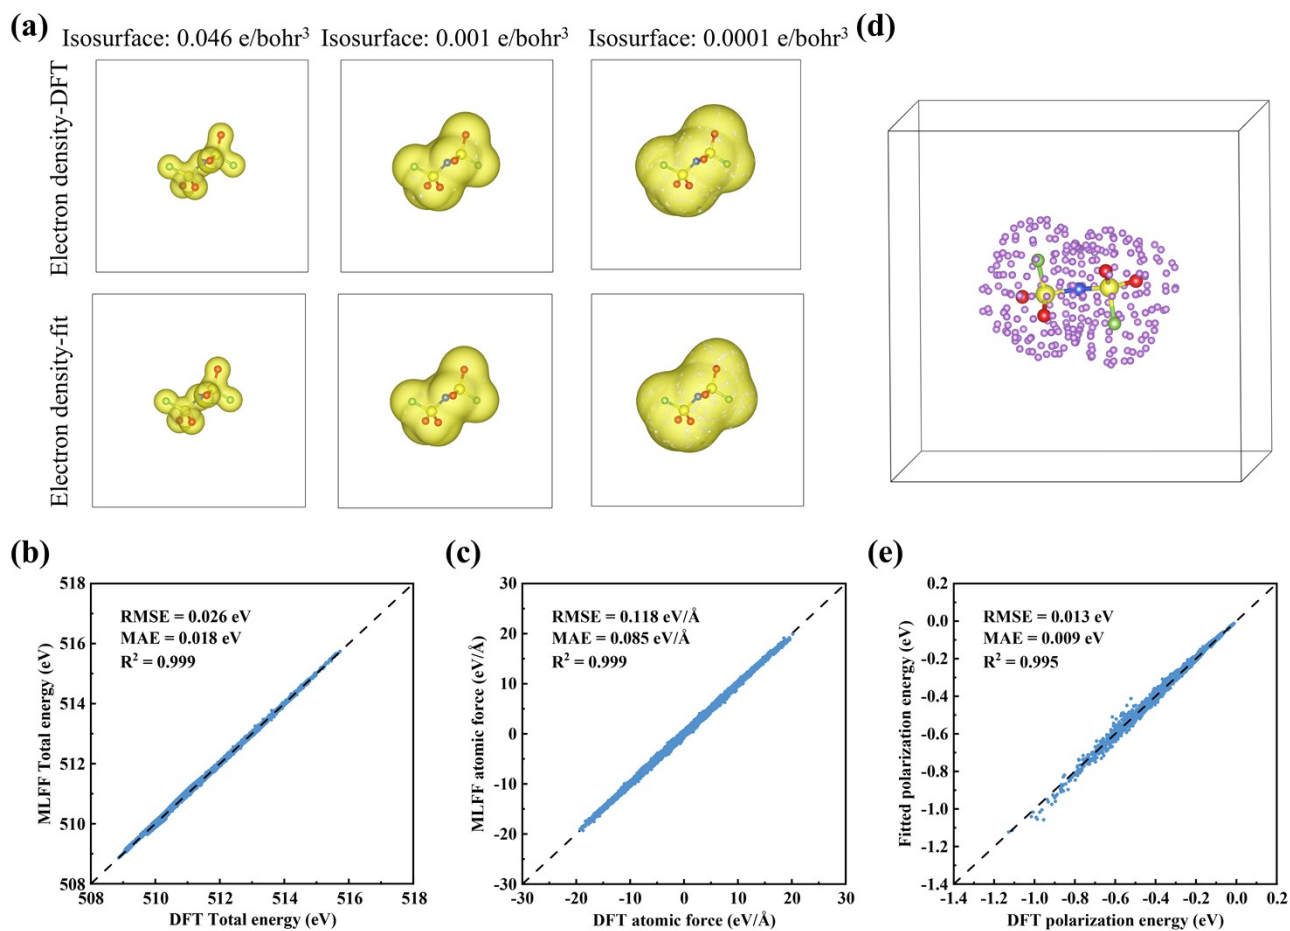

**Fig. S3** FSI anion analysis: (a) DFT-calculated (upper) vs. spherically-fitted (lower) electron density isosurfaces at multiple values; (b) MLFF-predicted total energy and (c) atomic forces across configurations; (d) Probe charge position  $R_p$  distribution at a representative probe-molecule distance; (e) Correlation between DFT-calculated and fitted polarization energies under varied probe configurations.

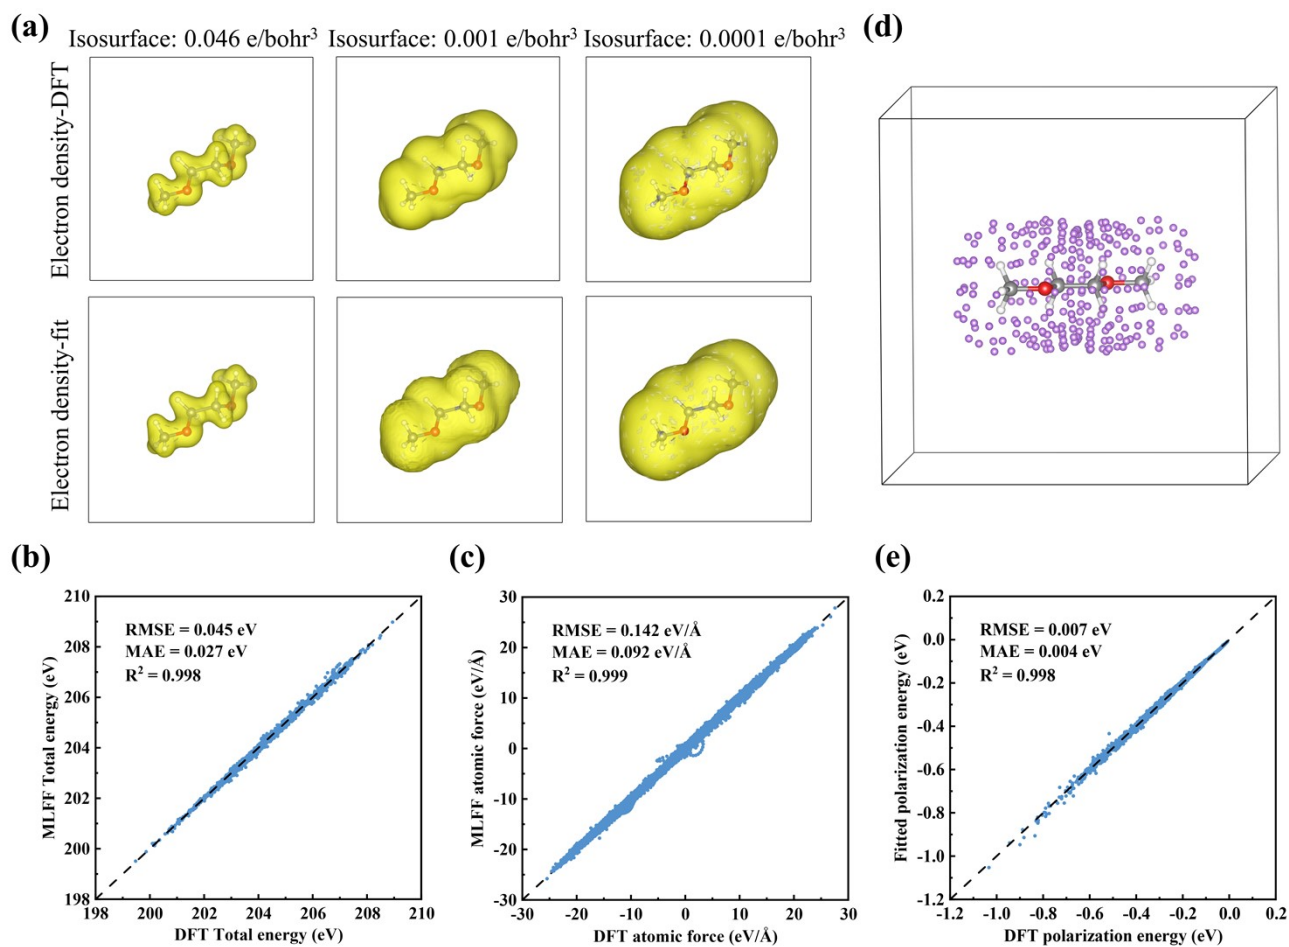

**Fig. S4** EGDME molecule analysis: (a) DFT-calculated (upper) vs. spherically-fitted (lower) electron density isosurfaces at multiple values; (b) MLFF-predicted total energy and (c) atomic forces across configurations; (d) Probe charge position  $R_p$  distribution at a representative probe-molecule distance; (e) Correlation between DFT-calculated and fitted polarization energies under varied probe configurations.

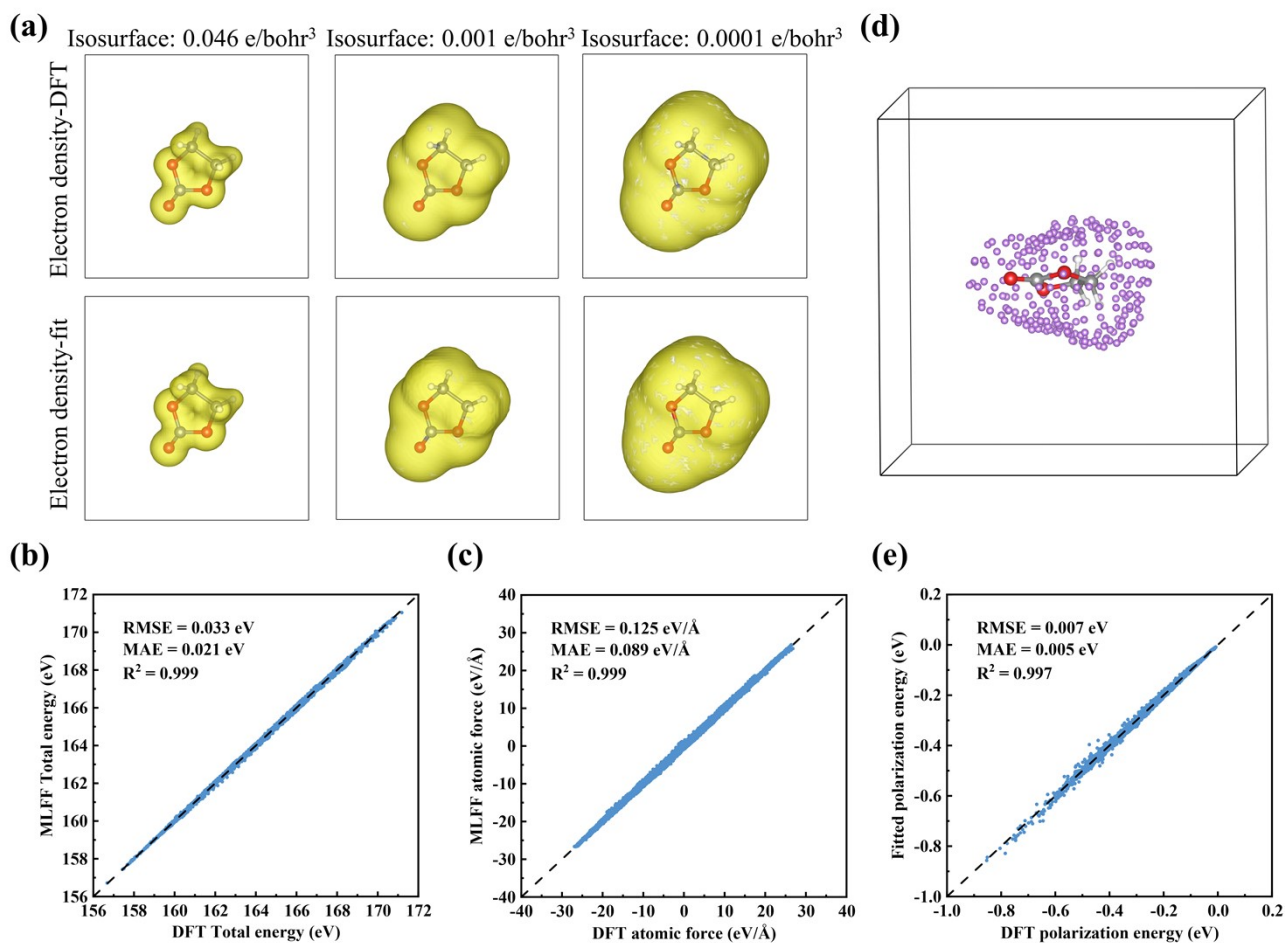

**Fig. S5** EC molecule analysis: (a) DFT-calculated (upper) vs. spherically-fitted (lower) electron density isosurfaces at multiple values; (b) MLFF-predicted total energy and (c) atomic forces across configurations; (d) Probe charge position  $R_p$  distribution at a representative probe-molecule distance; (e) Correlation between DFT-calculated and fitted polarization energies under varied probe configurations.

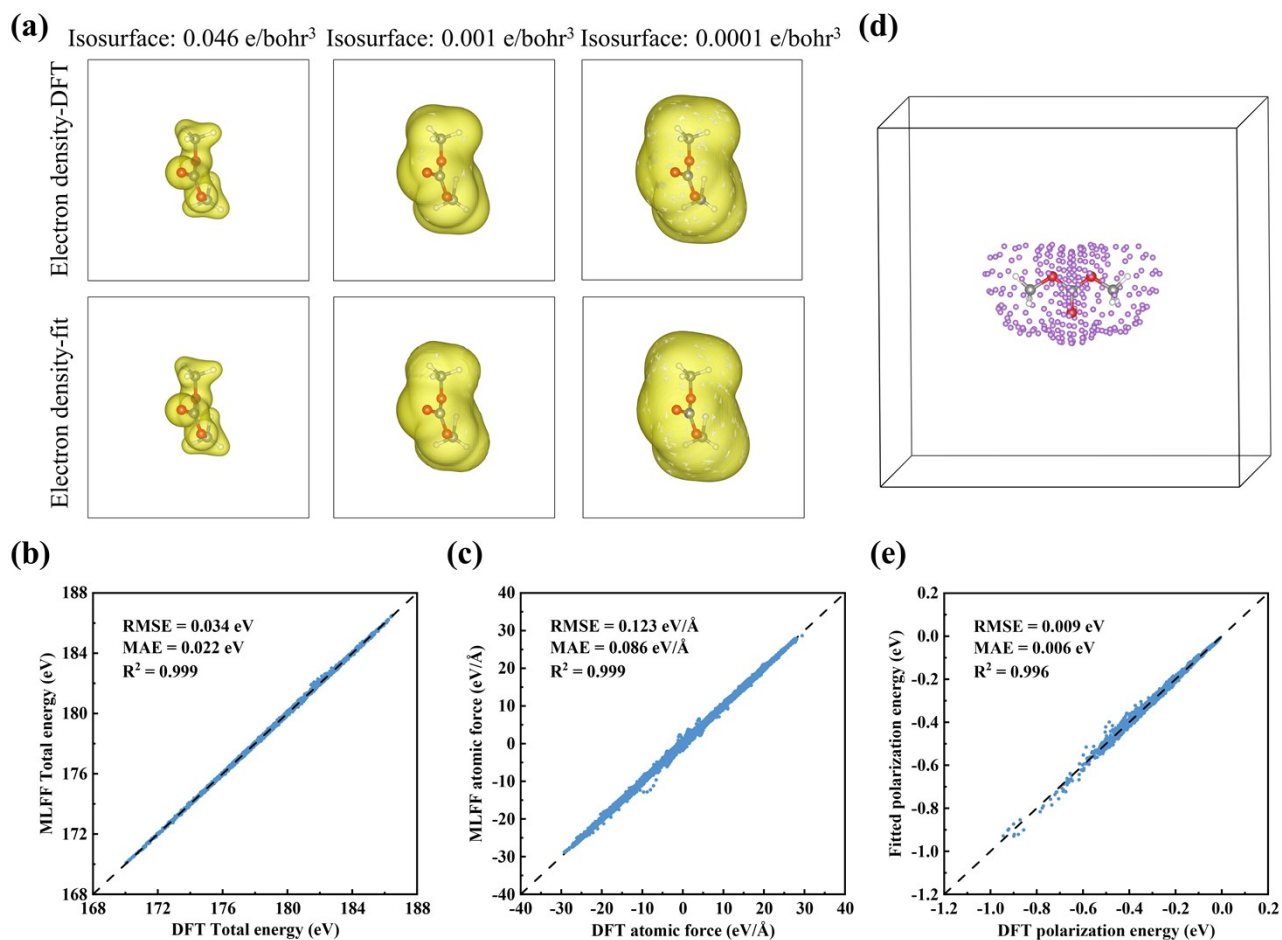

**Fig. S6** DMC molecule analysis: (a) DFT-calculated (upper) vs. spherically-fitted (lower) electron density isosurfaces at multiple values; (b) MLFF-predicted total energy and (c) atomic forces across configurations; (d) Probe charge position  $R_p$  distribution at a representative probe-molecule distance; (e) Correlation between DFT-calculated and fitted polarization energies under varied probe configurations.

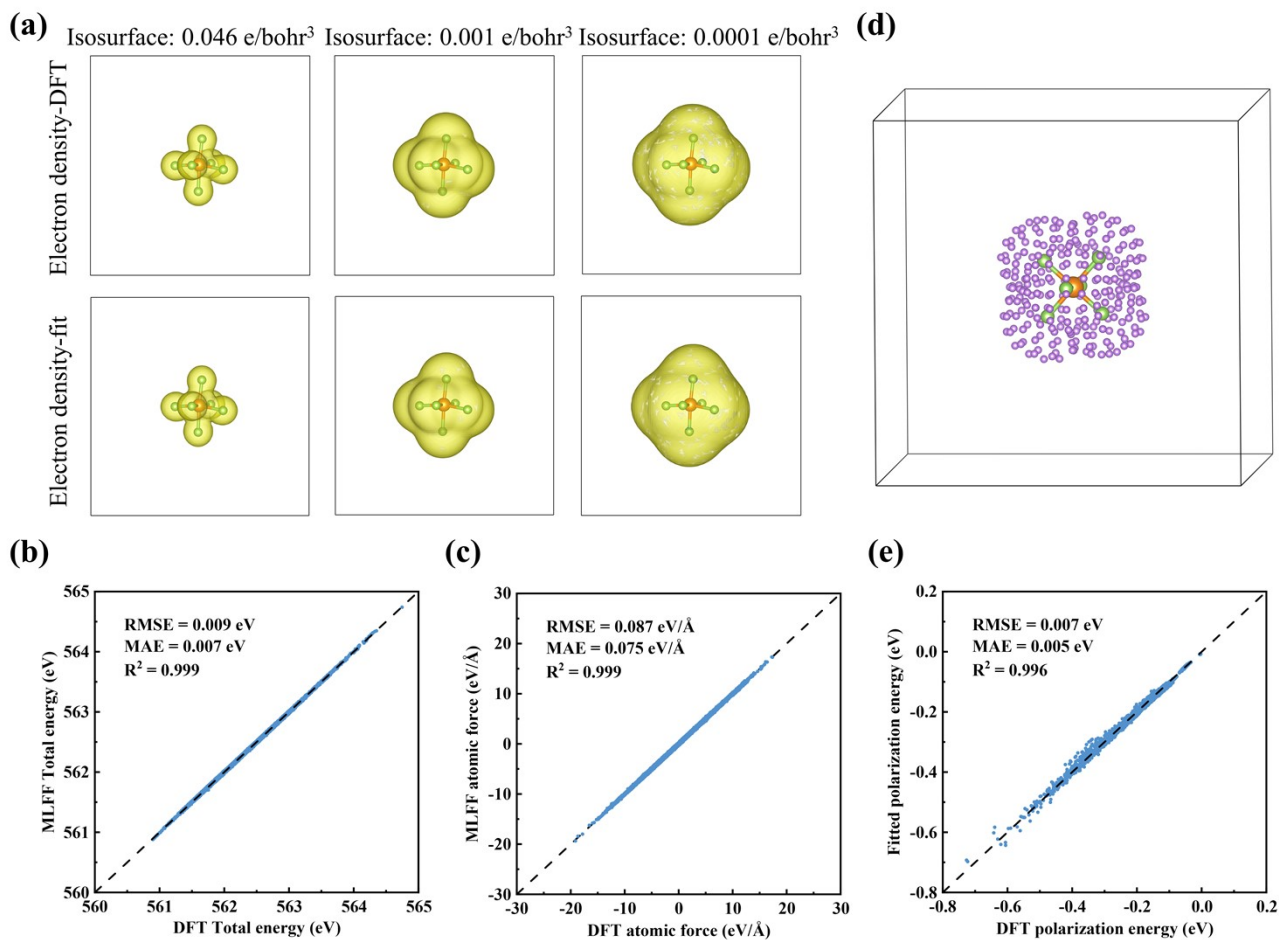

**Fig. S7** PF<sub>6</sub><sup>-</sup> analysis: (a) DFT-calculated (upper) vs. spherically-fitted (lower) electron density isosurfaces at multiple values; (b) MLFF-predicted total energy and (c) atomic forces across configurations; (d) Probe charge position Rp distribution at a representative probe-molecule distance; (e) Correlation between DFT-calculated and fitted polarization energies under varied probe configurations.



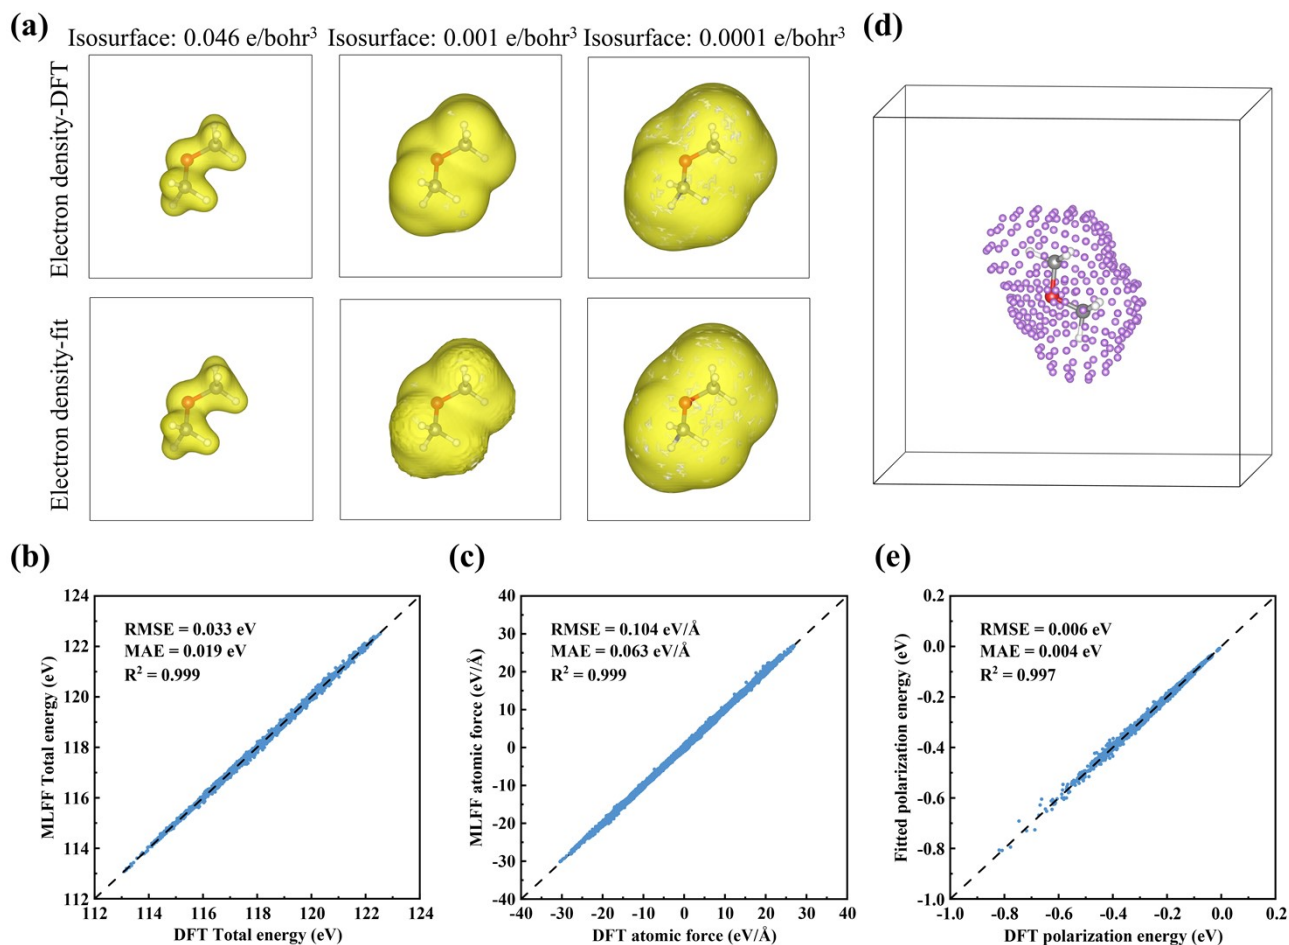

**Fig. S8** DME analysis: (a) DFT-calculated (upper) vs. spherically-fitted (lower) electron density isosurfaces at multiple values; (b) MLFF-predicted total energy and (c) atomic forces across configurations; (d) Probe charge position  $R_p$  distribution at a representative probe-molecule distance; (e) Correlation between DFT-calculated and fitted polarization energies under varied probe configurations.

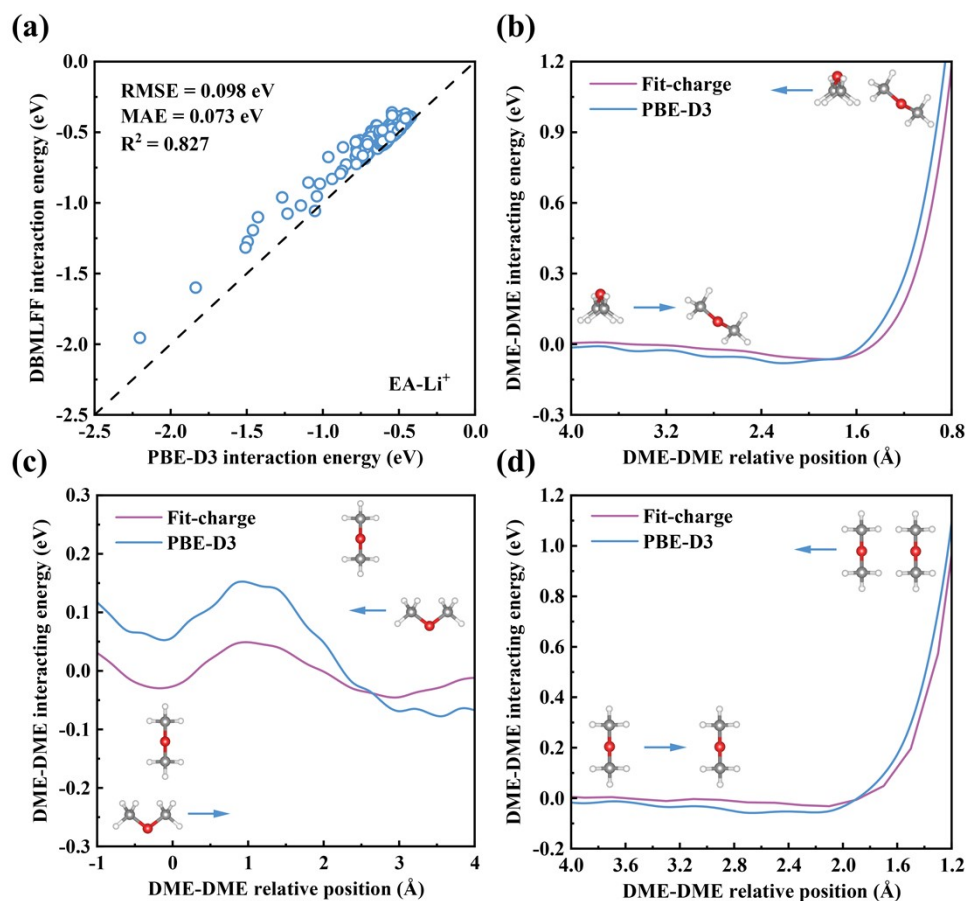

**Fig. S9** (a) Comparison of intermolecular interaction energies for the EA-Li<sup>+</sup> system between the DBMLFF model and DFT (PBE-D3) calculations, with random molecular displacements and orientations. (c)-(d) Comparison of DME-DME intermolecular interaction energies between the DBMLFF model and DFT (PBE-D3) for three representative configurations.

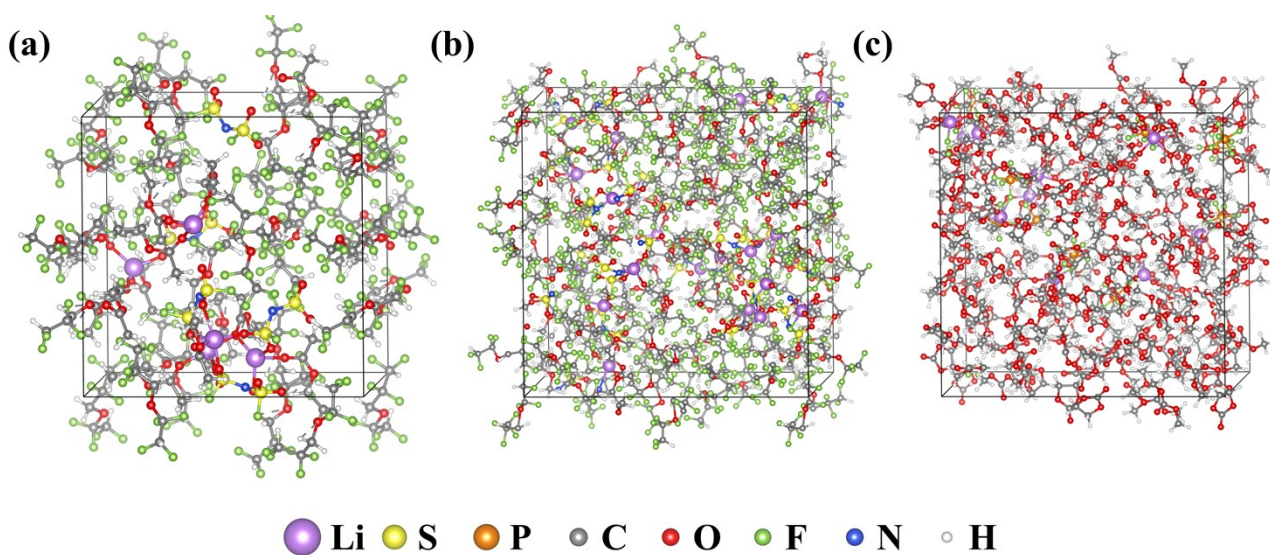

**Fig. S10** Structural snapshots of (a) the LiFSI/EA/TTE system, (b) the LiFSI/EGDME/TTE system, and (c) the LiPF<sub>6</sub>/EC/DMC system.

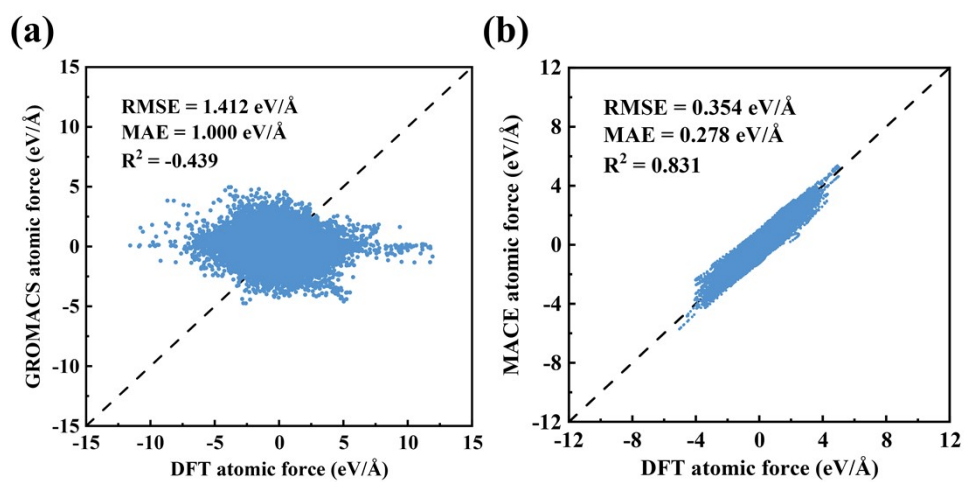

**Fig. S11** Benchmarking of simulated atomic forces against DFT for a 460-atom LiFSI/EA/TTE electrolyte system. (a) GROMACS. (b) MACE.

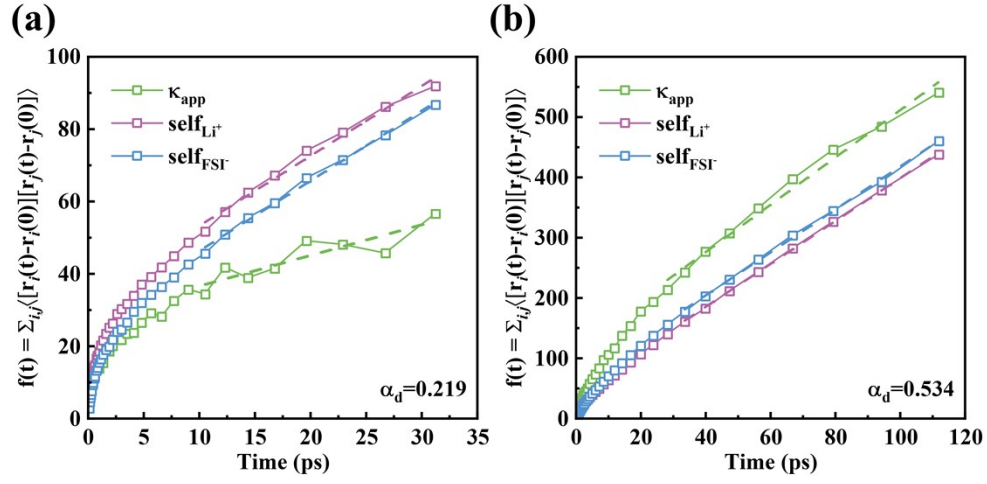

**Fig. S12** Compute  $\alpha(t)$  using the initial 4% segment of the MD trajectory for (a) LiFSI/EGDME/TTE and (b) LiPF<sub>6</sub>/EC/DMC electrolyte systems. Here,  $\kappa_{app}$  is the time correlation function for collective ion conduction;  $self_{Li^+}$  and  $self_{FSI^-}$  denote the self-diffusion correlation functions for Li<sup>+</sup> and FSI<sup>-</sup>, respectively.

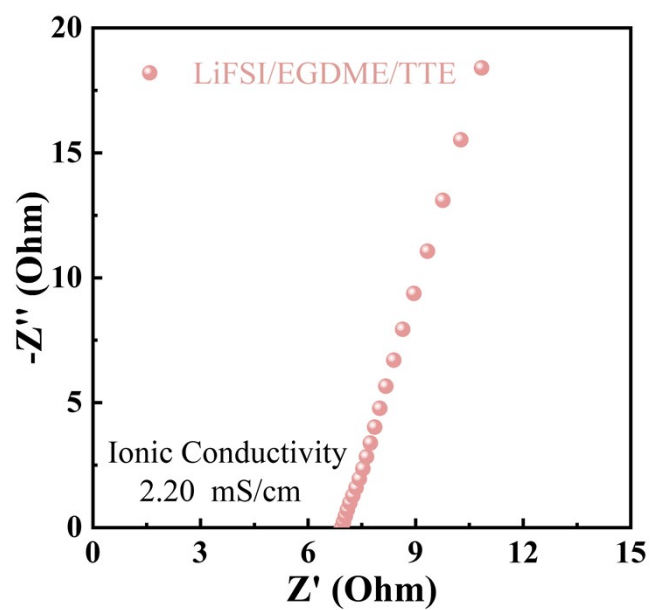

**Fig. S13** Nyquist plot of the LiFSI/EGDME/TTE electrolyte system, showing an ionic conductivity of 2.20 mS/cm.

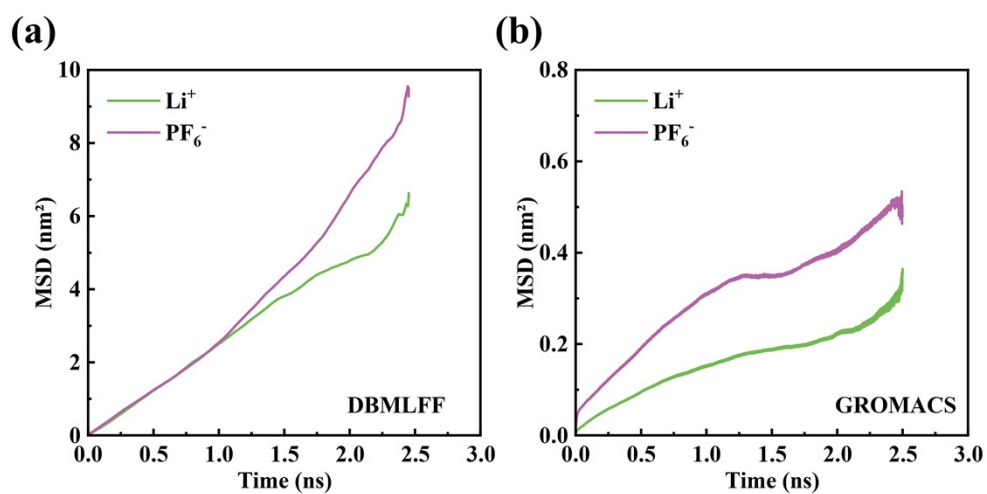

**Fig. S14** Mean square displacement (MSD) of Li<sup>+</sup> and PF<sub>6</sub><sup>-</sup> in the LiPF<sub>6</sub>/EC/DMC system from (a) DBMLFF and (b) GROMACS simulations.

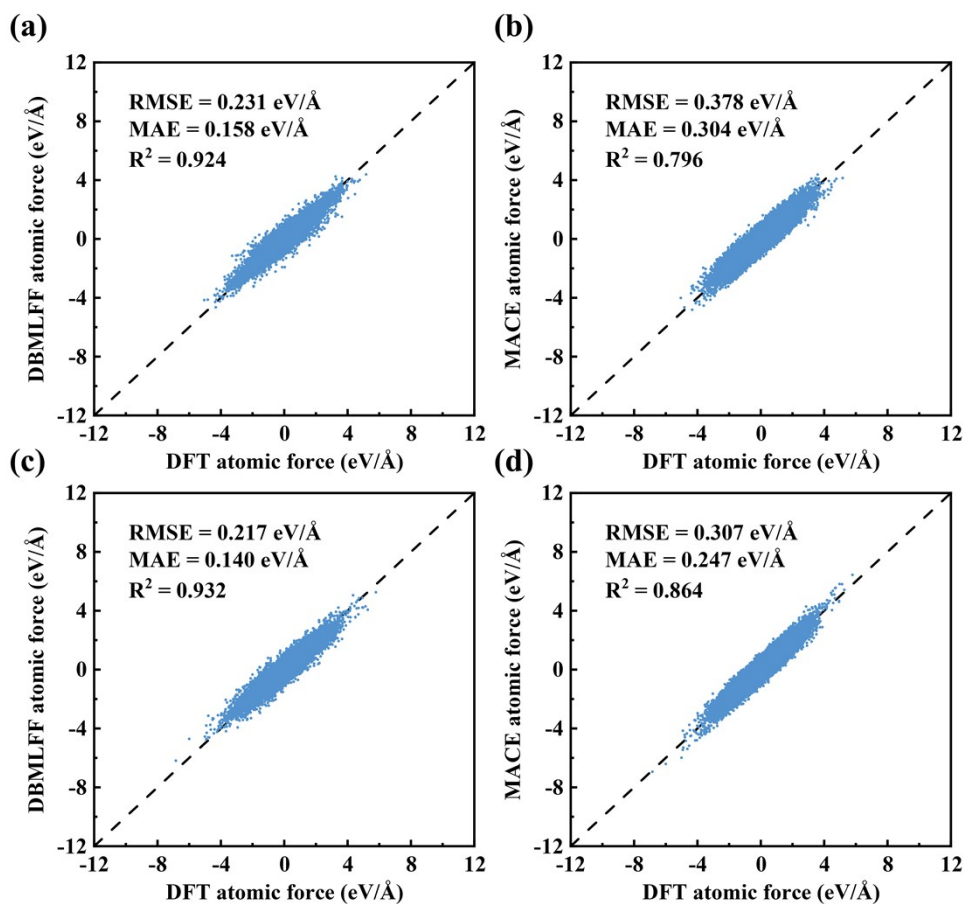

**Fig. S15** Benchmarking of ML-predicted atomic forces against reference DFT calculations. (a, b) Forces in the LiFSI/EGDME/TTE system predicted by (a) the DBMLFF and (b) the MACE model. (c, d) Forces in the LiPF<sub>6</sub>/EC/DMC system predicted by (c) the DBMLFF and (d) the MACE model.



Table S1. Diffusion coefficients and ionic conductivities ( $\kappa$ ) in the LiFSI/EGDME/TTE system, determined using various techniques.

| Methods     | $D_{\text{Li}^+}$<br>( $10^{-10} \text{ m}^2 \text{ s}^{-1}$ ) | $D_{\text{FSI}^-}$<br>( $10^{-10} \text{ m}^2 \text{ s}^{-1}$ ) | $\kappa$<br>( $\text{mS cm}^{-1}$ ) |
|-------------|----------------------------------------------------------------|-----------------------------------------------------------------|-------------------------------------|
| GROMACS     | 0.486                                                          | 0.704                                                           | 1.511                               |
| DBMLFF      | 0.849                                                          | 1.030                                                           | 2.386                               |
| Experiments | 1.377                                                          | 1.180                                                           | 2.200                               |

Table S2. Diffusion coefficients and ionic conductivities ( $\kappa$ ) in the  $\text{LiPF}_6/\text{EC}/\text{DMC}$  system, determined using various techniques.

| Methods     | $D_{\text{Li}^+}$<br>( $10^{-10} \text{ m}^2 \text{ s}^{-1}$ ) | $D_{\text{PF}_6^-}$<br>( $10^{-10} \text{ m}^2 \text{ s}^{-1}$ ) | $\kappa$<br>( $\text{mS cm}^{-1}$ ) |
|-------------|----------------------------------------------------------------|------------------------------------------------------------------|-------------------------------------|
| GROMACS     | 0.211                                                          | 0.422                                                            | 1.393                               |
| DBMLFF      | 3.581                                                          | 4.205                                                            | 13.800                              |
| Experiments | 1.8                                                            | 2.7                                                              | 11.2                                |

Table S3. Enthalpies of vaporization of different substances at 298 K and 1 atm.

| Molecule | GROMACS<br>(kJ·mol <sup>-1</sup> ) |      | DBMLFF<br>(kJ·mol <sup>-1</sup> ) |      | Experiments<br>(kJ·mol <sup>-1</sup> ) |
|----------|------------------------------------|------|-----------------------------------|------|----------------------------------------|
|          | Mean                               | SE   | Mean                              | SE   |                                        |
| DME      | 26.37                              | 0.01 | 23.40                             | 0.03 | 21.2 <sup>1</sup>                      |
| EA       | 53.87                              | 0.03 | 38.91                             | 0.02 | 35.69 <sup>2</sup>                     |
| TTE      | 44.79                              | 0.05 | 36.21                             | 0.09 | 40.2 <sup>3</sup>                      |
| EGDME    | 50.08                              | 0.39 | 38.36                             | 0.06 | 36.76 <sup>4</sup>                     |
| DMC      | 62.92                              | 0.02 | 43.75                             | 0.09 | 37.70 <sup>5</sup>                     |

## References

- 1 R. M. Stephenson and S. Malanowski, *Handbook of the Thermodynamics of Organic Compounds*, 1987.
- 2 V. Majer, V. Svoboda and H. V. Kehiaian, 1985.
- 3 J. Murata, S. Yamashita, M. Akiyama, S. Katayama, T. Hiaki and A. Sekiya, *J. Chem. Eng. Data*, 2002, **47**, 911–915.
- 4 D. Li, W. Fang, W. Xie, Y. Xing, Y. Guo and R. Lin, *Energy Fuels*, 2009, **23**, 794–798.
- 5 W. V. Steele, R. D. Chirico, S. E. Knipmeyer and A. Nguyen, *J. Chem. Eng. Data*, 1997, **42**, 1008–1020.
